# Supplementary material for: Regulation of the upconversion effect to promote the removal of biofilms on a titanium surface via photoelectrons
Source: Royal Society of Chemistry journal article supplement (doi:10.1039/d3tb02542j), 2024-01-01
Supplement: d3tb02542j1.pdf [file d3tb02542j1.pdf]

## Regulate Upconversion Effect to Promote Removal of Biofilms on Titanium Surface via Photoelectrons

Kai Wang,<sup>a</sup> Yufei Tang,<sup>b</sup> Keyi Yao,<sup>a</sup> Shuqi Feng,<sup>b</sup> Bingfeng Wu,<sup>b</sup> Lin Xiang,<sup>\*b</sup>  
Xuemei Zhou<sup>\*a</sup>

<sup>a</sup> School of Chemical Engineering, Sichuan University, Chengdu 610065, China.  
Email: xuemeizhou@scu.edu.cn.

<sup>b</sup> State Key Laboratory of Oral Diseases & National Center for Stomatology &  
National Clinical Research Center for Oral Diseases, West China Hospital of  
Stomatology, Sichuan University, Chengdu 610041, Sichuan, China. E-mail:  
dentistxiang@126.com.

## Contents

1. Experimental conditions to prepare different samples (**Table S1**)
2. Atomic percentage of samples according to XPS spectra (**Table S2**)
3. SEM image of side view of TiO<sub>2</sub> (**Fig. S1**)
4. SEM images of Au<sub>3</sub>/TiO<sub>2</sub> (**Fig. S2**)
5. Size distribution of Au NPs and RE NPs (**Fig. S3**)
6. EDS mapping of Au<sub>1</sub>-RE<sub>1</sub>(Yb<sub>20</sub>-Er<sub>2</sub>)/TiO<sub>2</sub> (**Fig. S4**)
7. XPS spectra of Au<sub>1</sub>-RE<sub>1</sub>(Yb<sub>20</sub>-Er<sub>2</sub>)/TiO<sub>2</sub> (**Fig. S5**)
8. The degradation curve of RhB (**Fig. S6**)
9. Absorbance of RhB aqueous solution measured over time, catalyzed by Fe<sup>2+</sup> and H<sub>2</sub>O<sub>2</sub> (**Fig. S7**)
10. The capability of Au<sub>1</sub>-RE<sub>1</sub>(Yb<sub>20</sub>-Er<sub>2</sub>)/TiO<sub>2</sub> to generate <sup>1</sup>O<sub>2</sub>, ·OH, and ·O<sub>2</sub><sup>-</sup> (**Fig. S8**)
11. Antibacterial effect under near infrared light after penetration (**Fig. S9**)
12. Illustration on the mechanism of bacterial death (**Fig. S10**)
13. Release of Au and Y ions from Au<sub>1</sub>-RE<sub>1</sub>(Yb<sub>20</sub>-Er<sub>2</sub>)/TiO<sub>2</sub> (**Fig. S11**)

**Table S1.** Experimental conditions to prepare different samples.

| Samples                                                                                | Au sputtering time (min) | RE deposition time (h) | Concentration of Yb <sup>3+</sup> (%) | Concentration of Er <sup>3+</sup> (%) |
|----------------------------------------------------------------------------------------|--------------------------|------------------------|---------------------------------------|---------------------------------------|
| TiO <sub>2</sub>                                                                       | 0                        | 0                      | 0                                     | 0                                     |
| Au <sub>α</sub> -RE <sub>1</sub> (Yb <sub>20</sub> -Er <sub>2</sub> )/TiO <sub>2</sub> | α=0, 1, 3                | 1                      | 20                                    | 2                                     |
| Au <sub>1</sub> -RE <sub>β</sub> (Yb <sub>20</sub> -Er <sub>2</sub> )/TiO <sub>2</sub> | 1                        | β=0, 1, 3              | 20                                    | 2                                     |
| Au <sub>1</sub> -RE <sub>1</sub> (Yb <sub>γ</sub> -Er <sub>2</sub> )/TiO <sub>2</sub>  | 1                        | 1                      | γ=0, 20, 40                           | 2                                     |
| Au <sub>1</sub> -RE <sub>1</sub> (Yb <sub>20</sub> -Er <sub>δ</sub> )/TiO <sub>2</sub> | 1                        | 1                      | 20                                    | δ=0, 2, 4                             |

**Table S2.** Atomic percentage (at. %) of different samples according to high-resolution XPS spectra of different elements.

| Samples/Elements                                                                       | C    | O    | F           | Na         | Ti   | Au          | Y          |
|----------------------------------------------------------------------------------------|------|------|-------------|------------|------|-------------|------------|
| Au <sub>1</sub> -RE <sub>1</sub> (Yb <sub>20</sub> -Er <sub>2</sub> )/TiO <sub>2</sub> | 31.4 | 21.4 | <b>28.5</b> | <b>4.1</b> | 4.3  | <b>6.3</b>  | <b>4.1</b> |
| Au <sub>3</sub> -RE <sub>1</sub> (Yb <sub>20</sub> -Er <sub>2</sub> )/TiO <sub>2</sub> | 28.4 | 20.5 | 21.9        | 3.6        | 6.3  | <b>12.4</b> | 6.9        |
| RE <sub>1</sub> (Yb <sub>20</sub> -Er <sub>2</sub> )/TiO <sub>2</sub>                  | 25.5 | 40.8 | <b>12.1</b> | <b>3.3</b> | 16.4 | 0           | <b>1.9</b> |
| Au <sub>1</sub> -RE <sub>3</sub> (Yb <sub>20</sub> -Er <sub>2</sub> )/TiO <sub>2</sub> | 27.6 | 14.3 | <b>33.7</b> | <b>5.5</b> | 4.0  | 9.0         | <b>7.4</b> |
| Au <sub>1</sub> /TiO <sub>2</sub>                                                      | 29.5 | 33.5 | 0           | 0          | 16.6 | 20.4        | 0          |

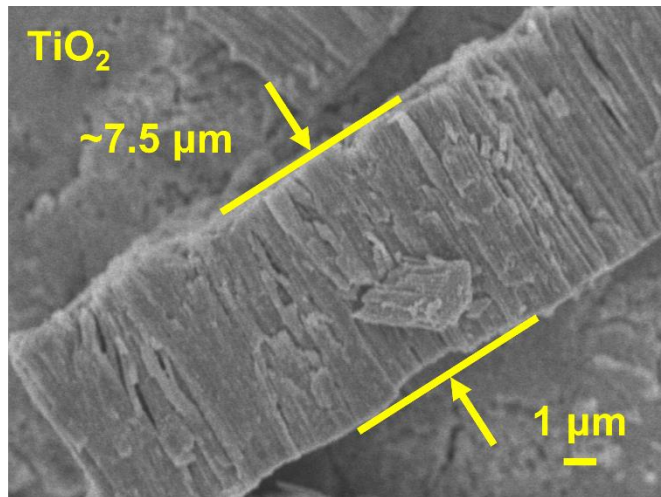

**Fig. S1.** SEM image of side view of TiO<sub>2</sub>.

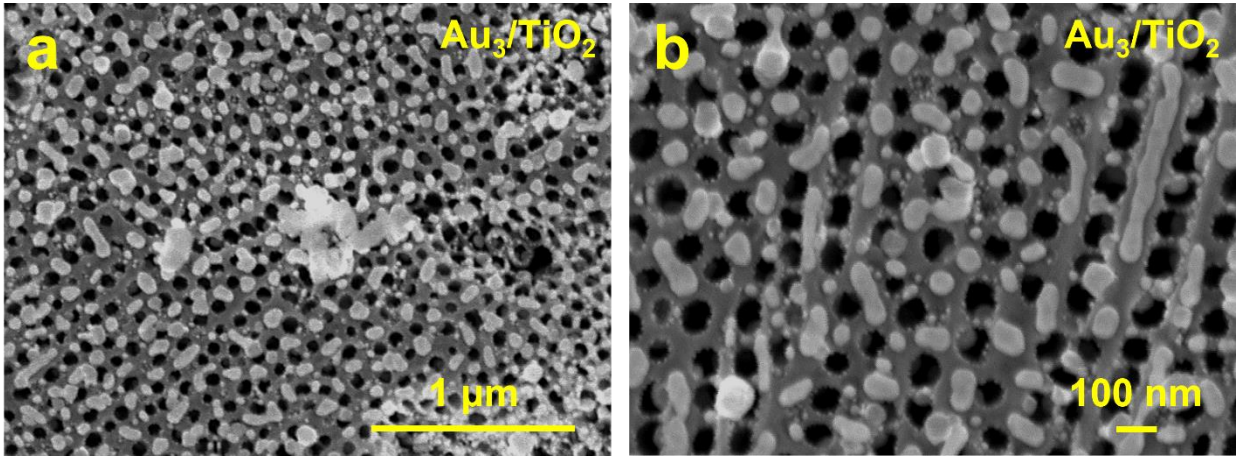

**Fig. S2.** SEM images of Au<sub>3</sub>/TiO<sub>2</sub> in (a) overview and (b) close observation.

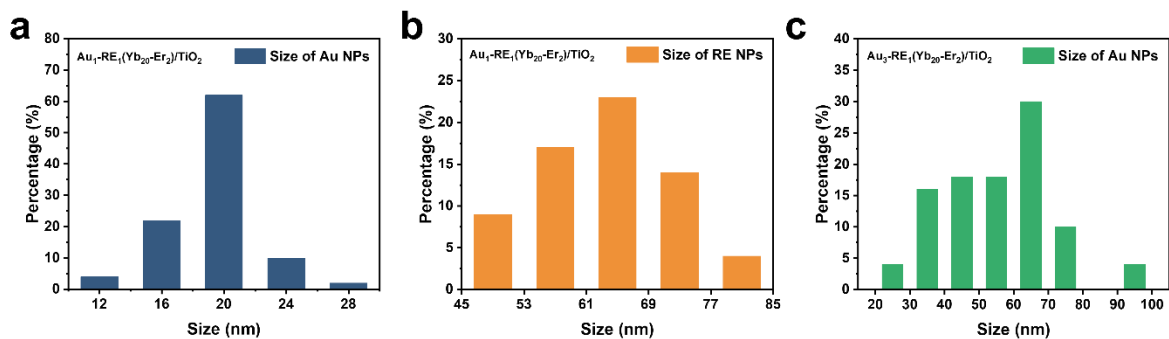

**Fig. S3.** Analysis on the size distribution of (a) Au NPs ( $20\pm 3$  nm) and (b) RE NPs ( $64\pm 9$  nm) for  $\text{Au}_1\text{-RE}_1(\text{Yb}_{20}\text{-Er}_2)/\text{TiO}_2$ . (c) Analysis on the size distribution of Au NPs for  $\text{Au}_3\text{-RE}_1(\text{Yb}_{20}\text{-Er}_2)/\text{TiO}_2$  ( $55\pm 16$  nm).

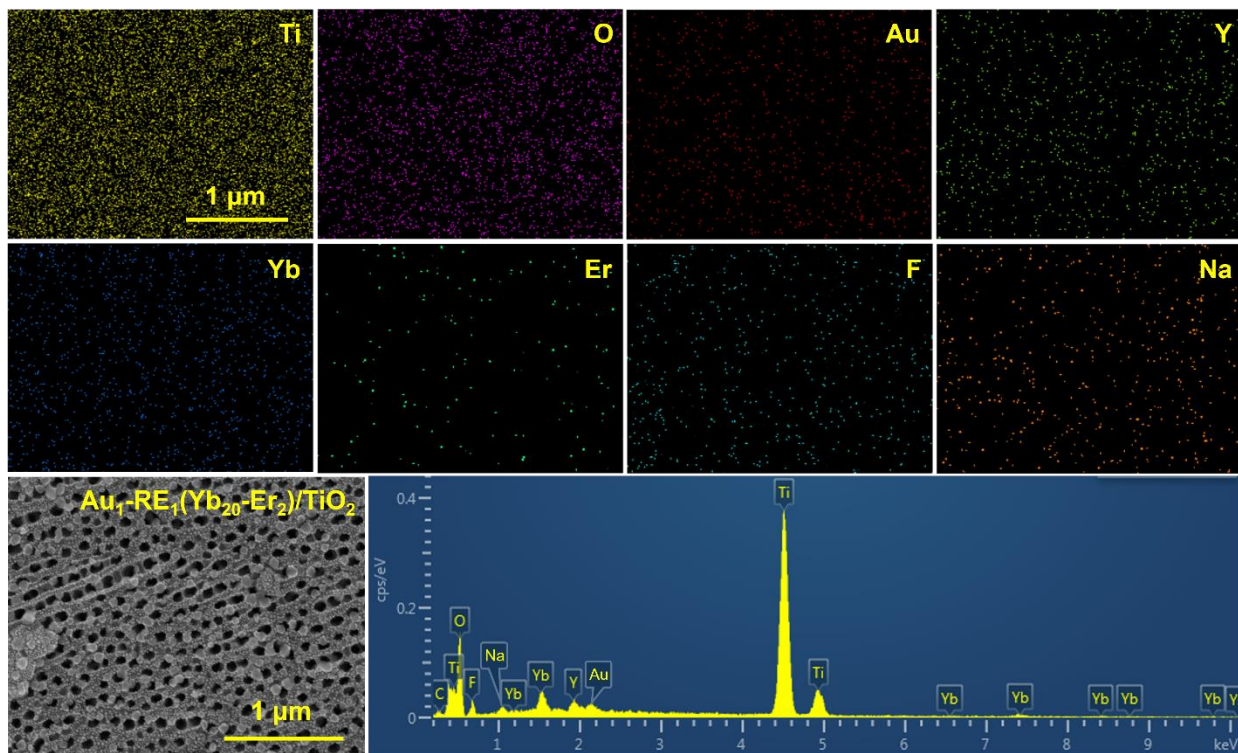

**Fig. S4.** EDS mapping of  $\text{Au}_1\text{-RE}_1(\text{Yb}_{20}\text{-Er}_2)/\text{TiO}_2$ .



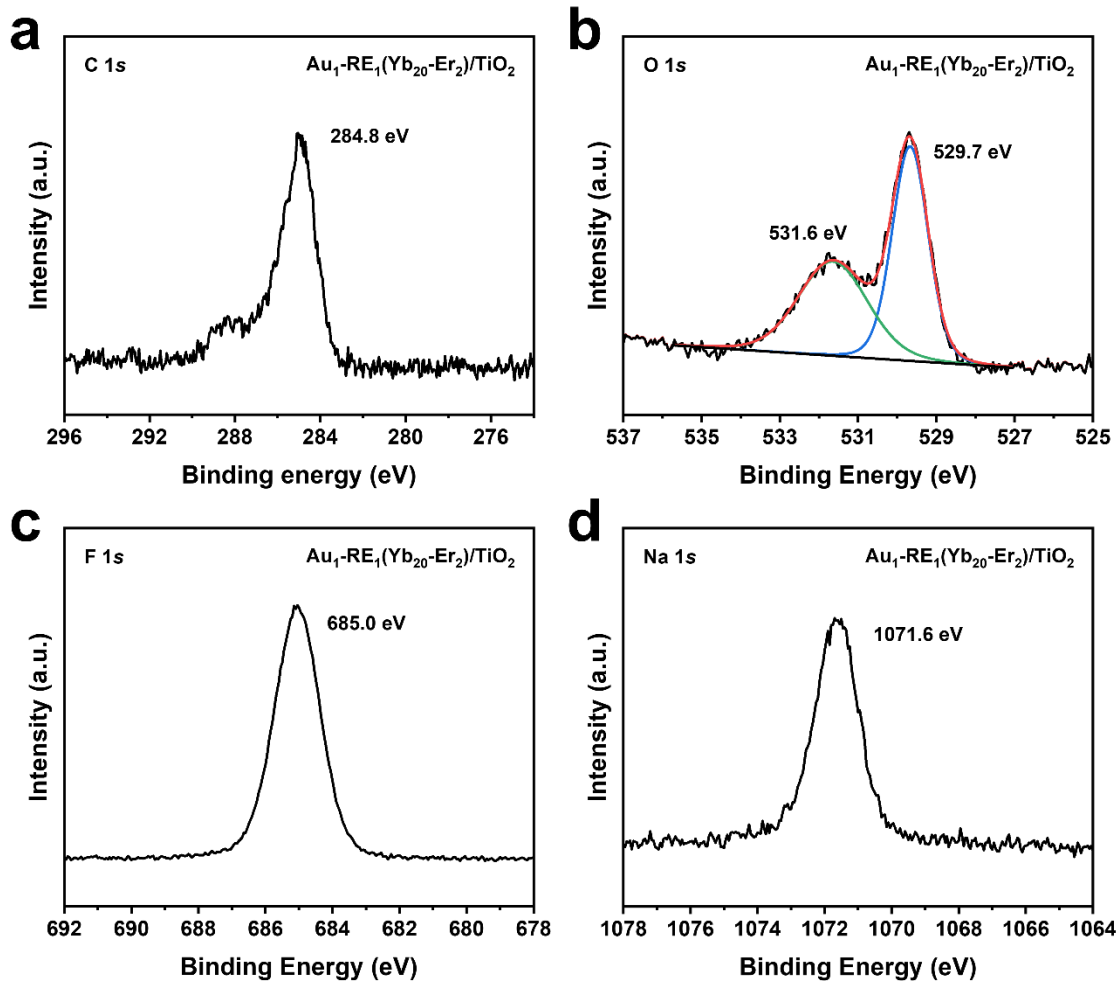

**Fig. S5.** XPS spectra of (a) C 1s, (b) O 1s, (c) F 1s, and (d) Na1s.  $\text{Au}_1\text{-RE}_1(\text{Yb}_{20}\text{-Er}_2)/\text{TiO}_2$ .

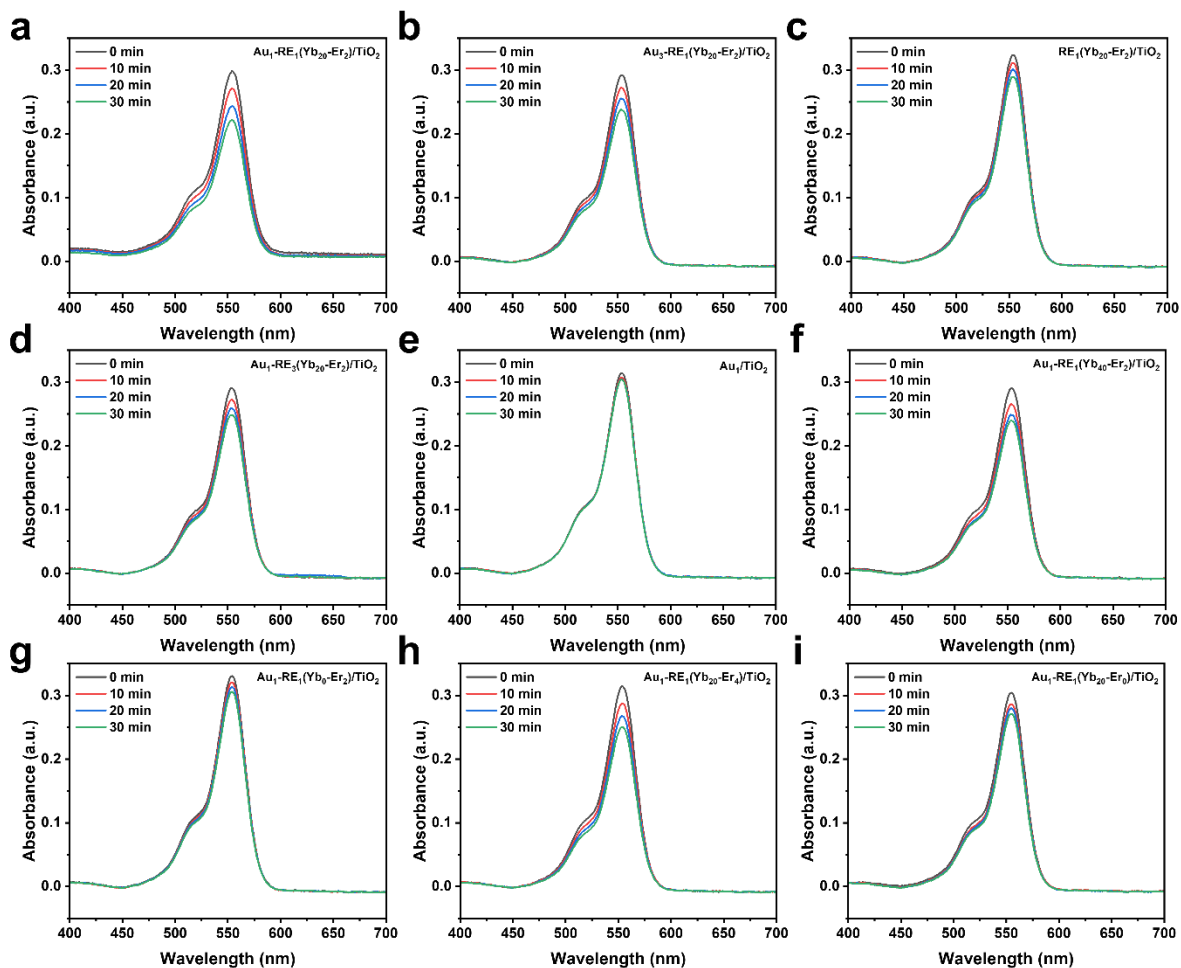

**Fig. S6.** The degradation curve of RhB for different samples under NIR irradiation: (a)  $\text{Au}_1\text{-RE}_1(\text{Yb}_{20}\text{-Er}_2)/\text{TiO}_2$  (b-c) different Au loading, (d-e) different RE deposition amount, (f-g) different concentration of  $\text{Yb}^{3+}$ , (h-i) different concentration of  $\text{Er}^{3+}$ .

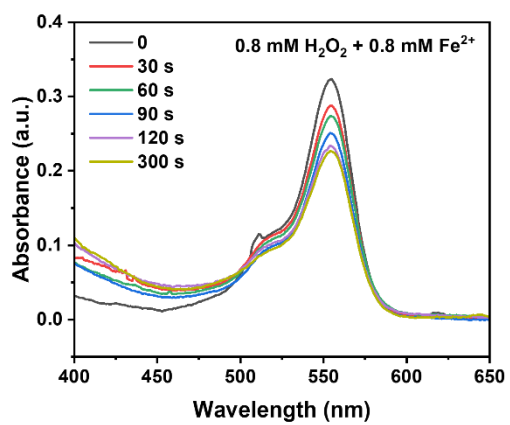

**Fig. S7.** Absorbance of RhB aqueous solution measured over time, catalyzed by Fe<sup>2+</sup> (0.8 mM) and H<sub>2</sub>O<sub>2</sub> (0.8 mM).

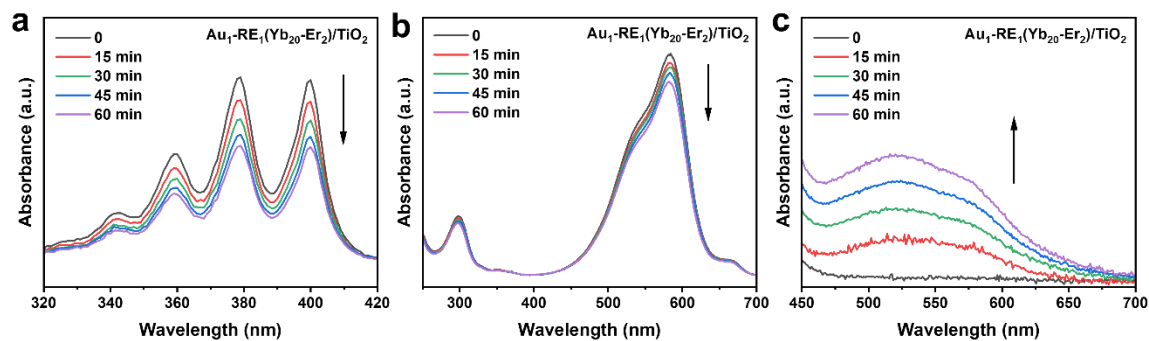

**Fig. S8.** UV-vis absorbance spectra of (a) ADBA and (b) MV for  $Au_1-RE_1(Yb_{20}-Er_2)/TiO_2$  under NIR irradiation. (c) Absorbance of NBT solution with  $Au_1-RE_1(Yb_{20}-Er_2)/TiO_2$  under NIR irradiation.

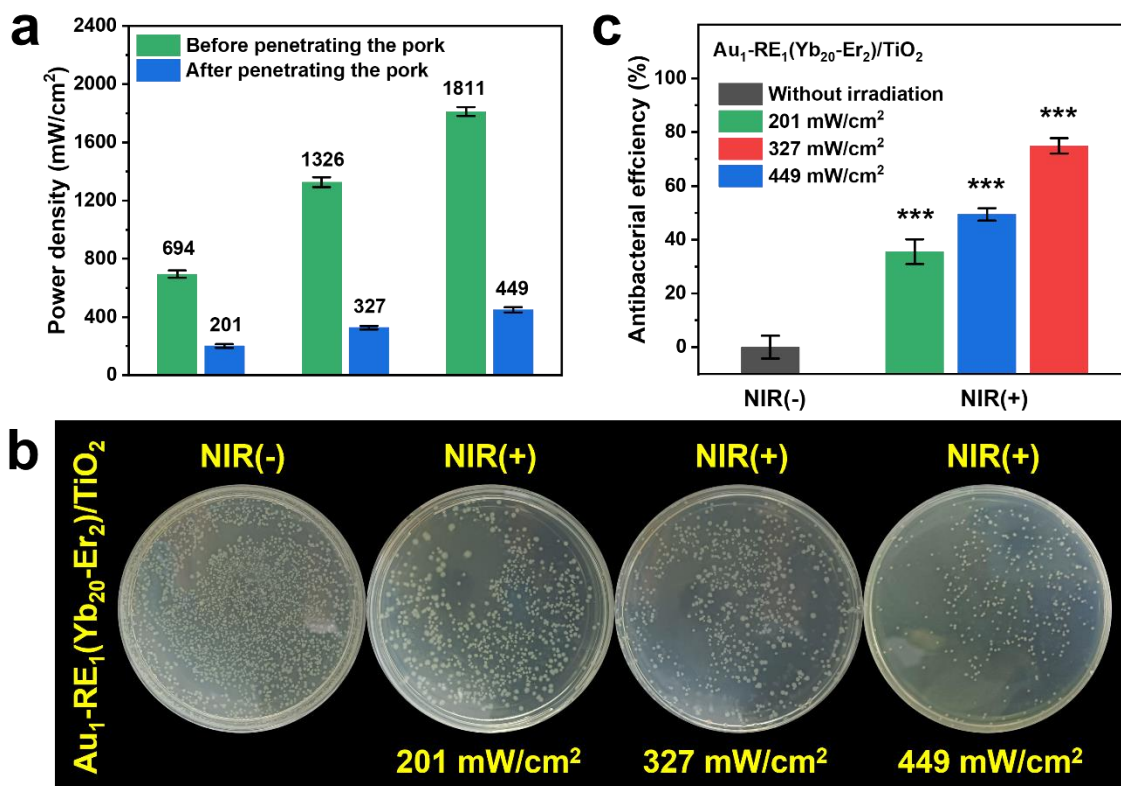

**Fig. S9.** (a) Penetration ability of the 980 nm laser in 3 mm thick pork. (b) and (c) Antibacterial effect of NIR with different power density after penetrating 3 mm thick pork. The statistics were presented as means  $\pm$  S. D.,  $n=3$ , \*  $p<0.05$ , \*\*  $p<0.01$ , \*\*\*  $p<0.001$ , and ns (not significant).

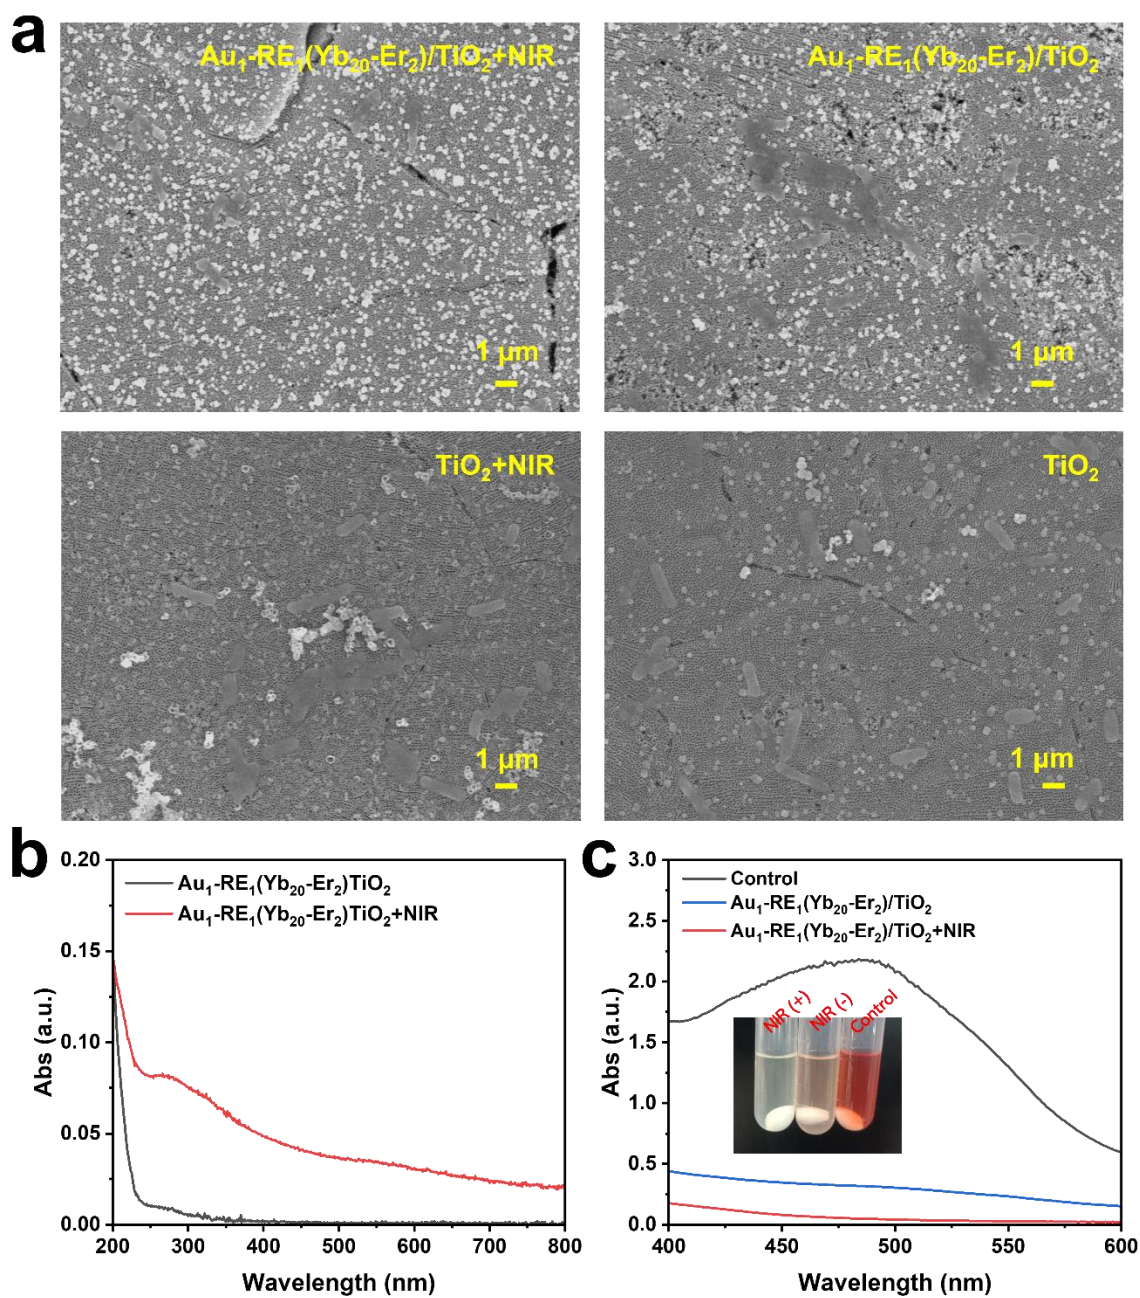

**Fig. S10.** (a) SEM images of *E. coli* of  $\text{Au}_1\text{-RE}_1(\text{Yb}_{20}\text{-Er}_2)/\text{TiO}_2$  and  $\text{TiO}_2$  under NIR irradiation or dark. (b) The release of nucleic acid and protein from *E. coli* of  $\text{Au}_1\text{-RE}_1(\text{Yb}_{20}\text{-Er}_2)/\text{TiO}_2$  group under NIR irradiation or dark. (c) The absorption curves of *E. coli* of control and  $\text{Au}_1\text{-RE}_1(\text{Yb}_{20}\text{-Er}_2)/\text{TiO}_2$  mixed with INT solution under NIR irradiation or dark.

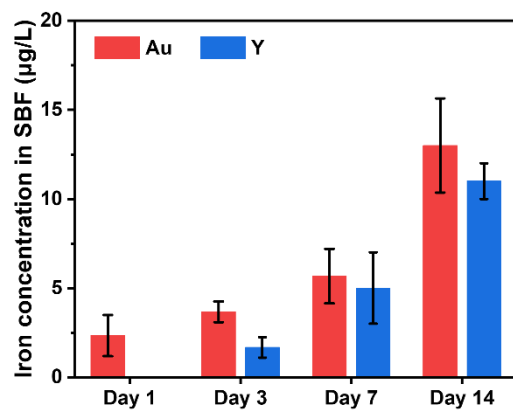

**Fig. S11.** Release of Au and Y ions from  $\text{Au}_1\text{-RE}_1(\text{Yb}_{20}\text{-Er}_2)/\text{TiO}_2$  in SBF solution, detected on day 1, 3, 7, and 14.
